# Supplementary material for: Synthesis of star-glycopolymers by Cu(0)-mediated radical polymerisation in the absence and presence of oxygen
Source: Royal Society of Chemistry journal article supplement (doi:10.1039/c6ra28763h), 2017-01-01
Supplement: c6ra28763h1.pdf [file c6ra28763h1.pdf]

## Supporting Information

### Synthesis of Star-Glycopolymers by Cu(0)-mediated Radical Polymerisation in the Absence and Presence of Oxygen

Hui Xue,<sup>#</sup> Lun Peng,<sup>#</sup> Yishi Dong, Yuqing Zheng, Yafei Luan, Xiang Hu, Gaojian Chen\* and Hong Chen\*

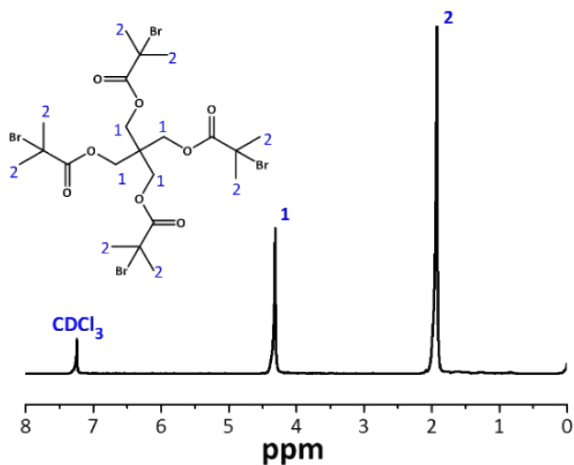

**Fig. S1** <sup>1</sup>H-NMR spectrum of star initiator in CDCl<sub>3</sub>.

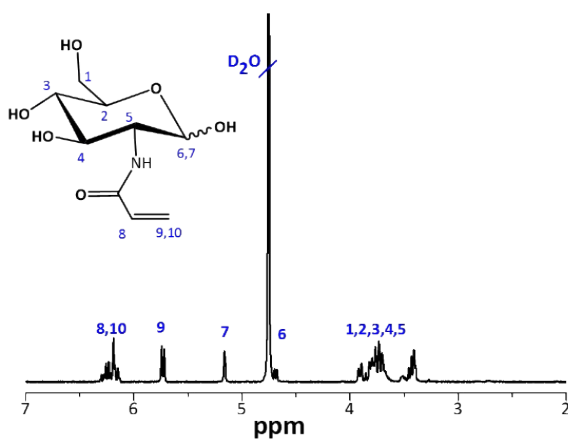

**Fig. S2** <sup>1</sup>H-NMR spectrum of AGA in D<sub>2</sub>O.

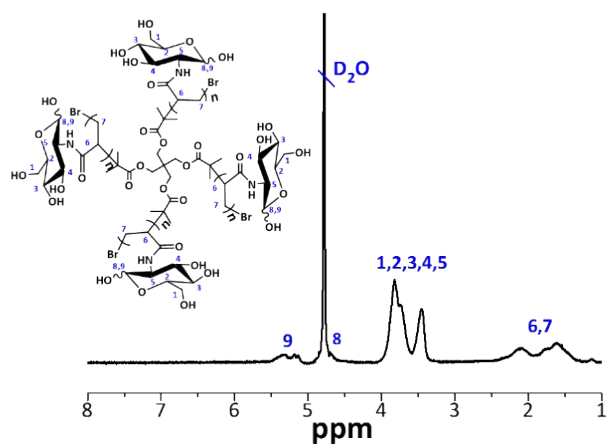

**Fig. S3** Typical <sup>1</sup>H-NMR spectrum of star-PAGA in D<sub>2</sub>O.

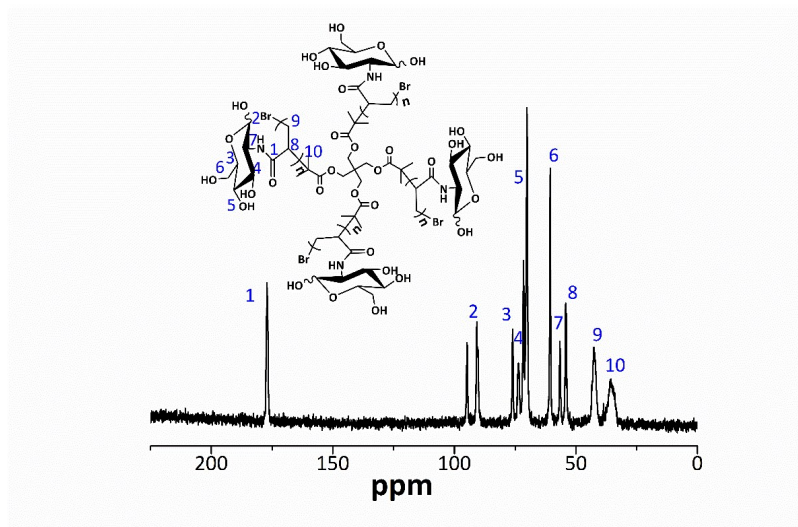

**Fig. S4** Typical <sup>13</sup>C-NMR spectrum of star-PAGA in D<sub>2</sub>O.

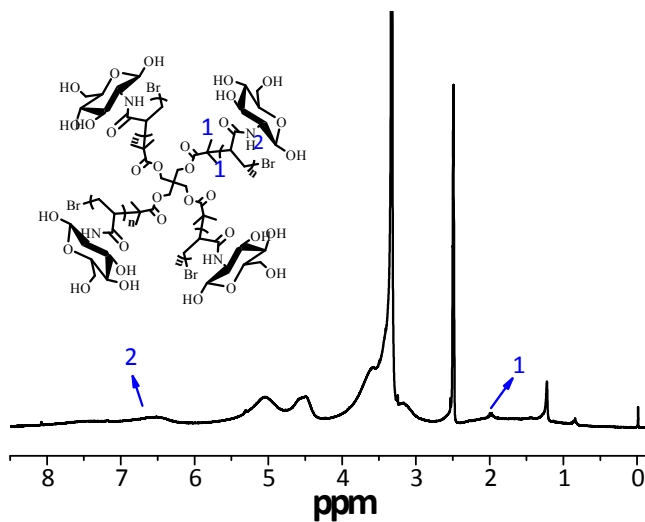

**Fig. S5** Typical  $^1\text{H}$ -NMR spectrum of star-PAGA in  $\text{DMSO-d}_6$ .

**Table. S1** The 4-arm star glycopolymers molecular weight results measured by GPC and  $^1\text{H}$ -NMR.

| Polymer | Conversion (%) | Mn<br>(theoretical) | Mn<br>(by GPC) | PDI<br>(by GPC) | Integration <sub>NMR</sub><br>(-CH <sub>3</sub> : -CONH-) | Mn<br>(by NMR) |
|---------|----------------|---------------------|----------------|-----------------|-----------------------------------------------------------|----------------|
| 1       | 34.2           | 13400               | 10400          | 1.67            | 24: 46.2                                                  | 11500          |
| 2       | 36.7           | 14400               | 18700          | 1.45            | 24: 84.8                                                  | 20500          |
| 3       | 75.7           | 28900               | 29200          | 1.55            | 24: 133.7                                                 | 31900          |
